# Supplementary material
Source: Springer Nature journal article supplement (https://www.springermedizin.de/resource/supplementary/13054_2012_1056_MOESM7_ESM.pdf/9709886)

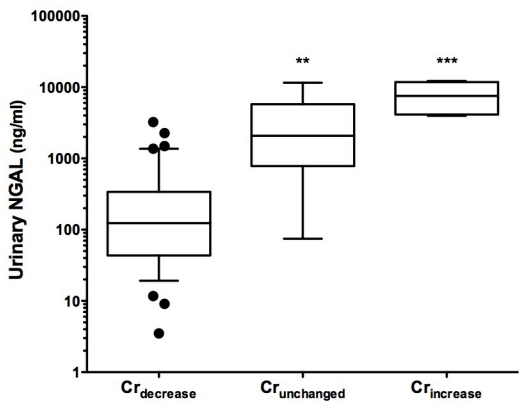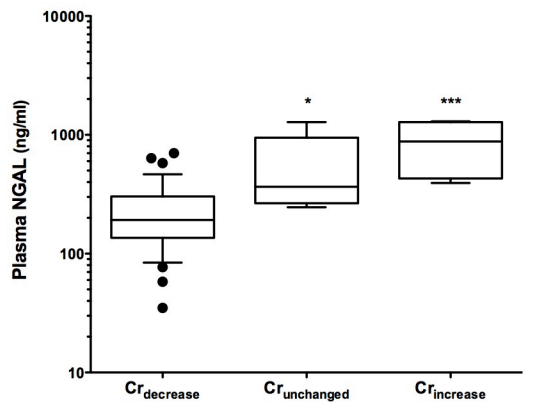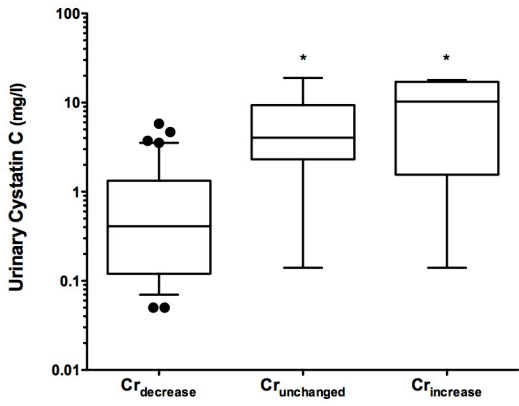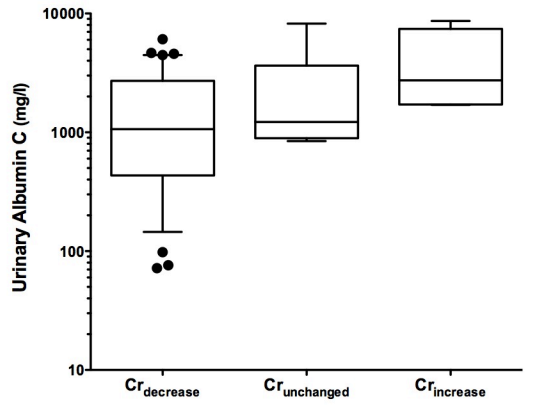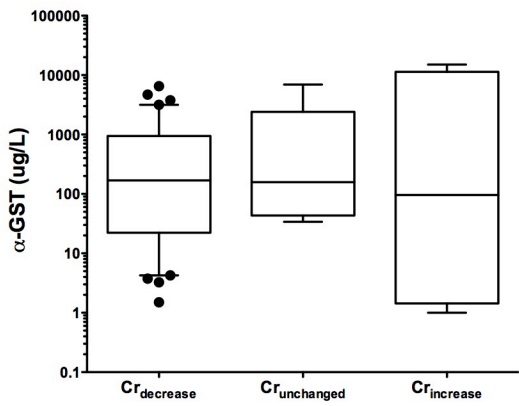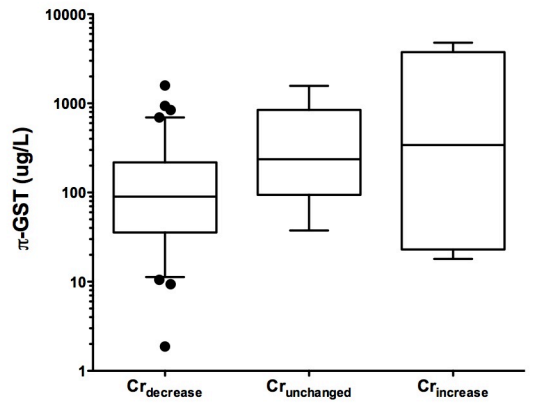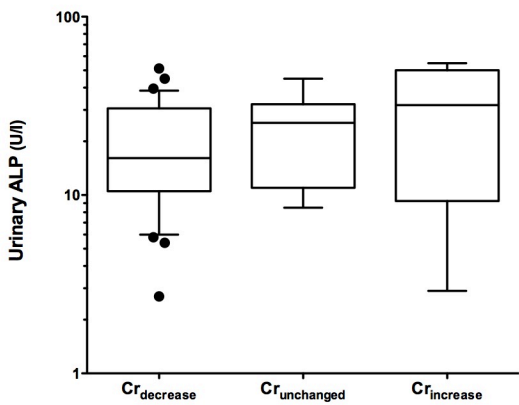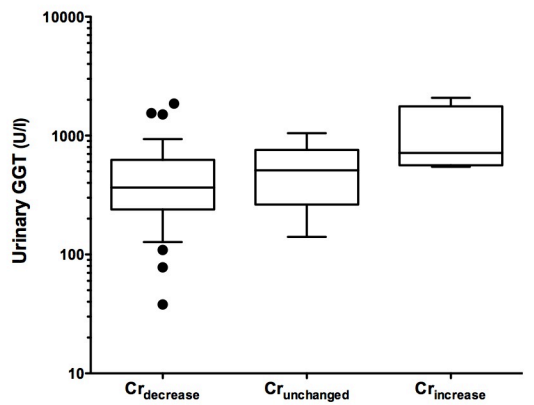

Supplement: MOESM7 [file 9709886]
